# Supplementary material for: Cdk5-mediated inhibition of APC/C-Cdh1 switches on the cyclin D1-Cdk4-pRb pathway causing aberrant S-phase entry of postmitotic neurons
Source: PubMed Central journal article supplement (PMC4674757; doi:10.1038/srep18180), 2015-12-10
Supplement: srep18180-s1.pdf [file srep18180-s1.pdf]

# Supplementary Figures

**Title: Cdk5-mediated inhibition of APC/C-Cdh1 switches on the cyclin D1-Cdk4-pRb pathway causing aberrant S-phase entry of postmitotic neurons**

Authors: Miguel Veas-Pérez de Tudela<sup>1,2</sup>, Carolina Maestre<sup>1</sup>, María Delgado-Esteban<sup>1,2</sup>, Juan P. Bolaños<sup>1,2</sup> and Angeles Almeida<sup>1,2\*</sup>

<sup>1</sup>Institute of Biomedical Research of Salamanca (IBSAL), University Hospital of Salamanca – University of Salamanca, 37007 Salamanca, Spain

<sup>2</sup>Institute of Functional Biology and Genomics (IBFG), University of Salamanca-CSIC, 37007 Salamanca, Spain

Corresponding author:

\*Angeles Almeida,

Institute of Biomedical Research of Salamanca (IBSAL),

University Hospital of Salamanca – University of Salamanca

Calle Zacarías González, 2

37007 Salamanca

Spain

Phone: +34 923 294 908

Fax: +34 923 224 876

E-mail: [aaparra@usal.es](mailto:aaparra@usal.es)

Supplementary Figure 1 - Veas-Perez de Tudela et al

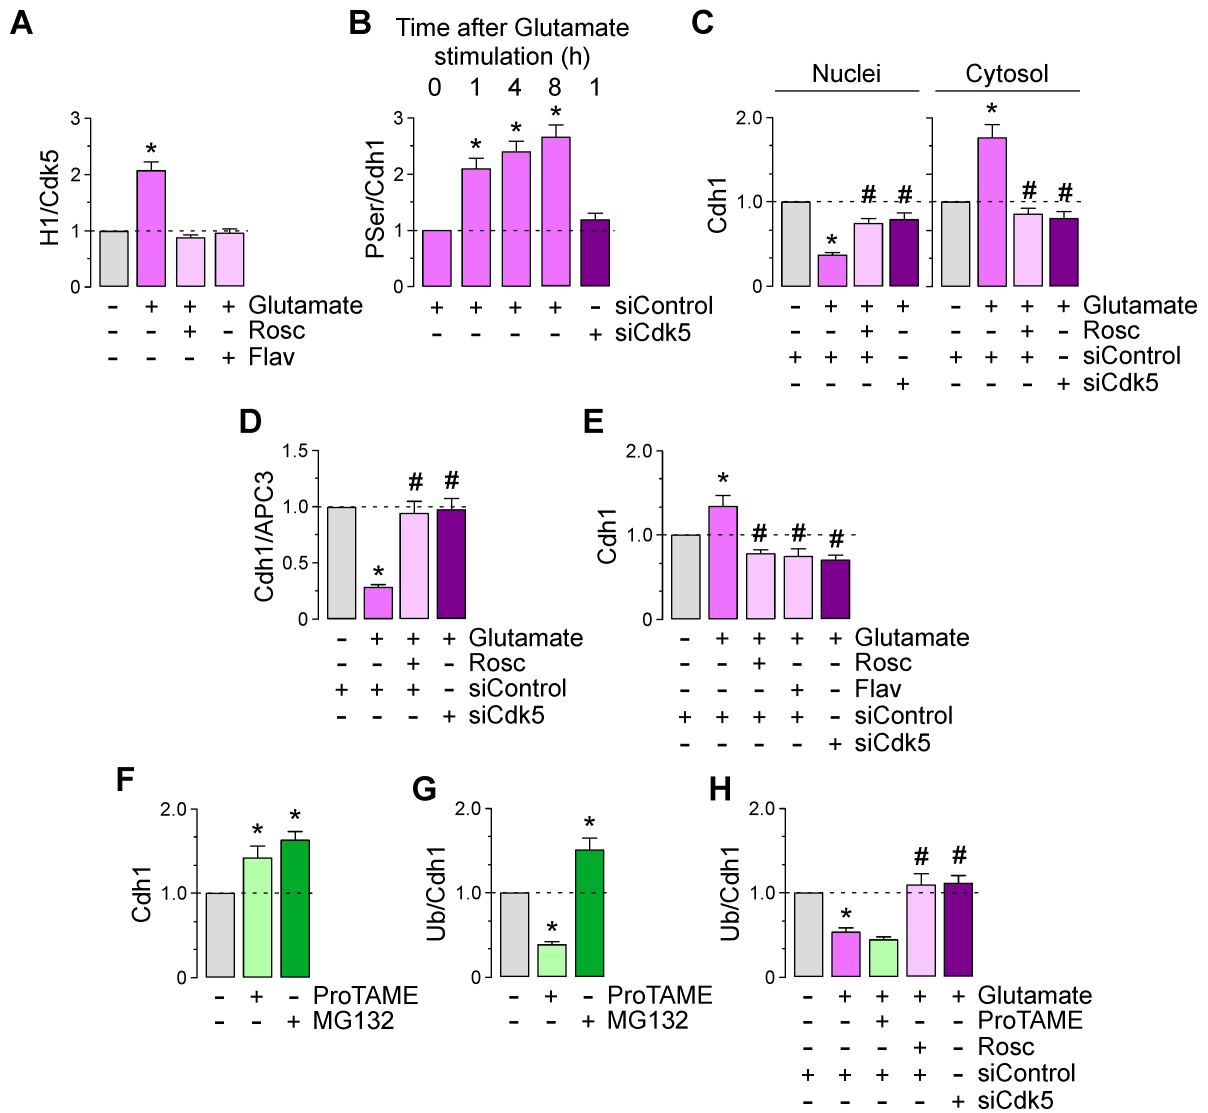

**Supplementary Figure 1. Relative protein abundances quantification from results shown in Figs. 1 and 2.** (A) Results of the relative quantification of protein abundance of Fig. 1A. (B) Results of the relative quantification of protein abundance of Fig. 1B. (C) Results of the relative quantification of protein abundance of Fig. 1C. (D) Results of the relative quantification of protein abundance of Fig. 1E. (E) Results of the relative quantification of protein abundance of Fig. 2A. (F) Results of the relative quantification of protein abundance of Fig. 2B. (G) Results of the relative quantification of protein abundance of Fig. 2C. (H) Results of the relative quantification of protein abundance of Fig. 2D. Data are expressed as means  $\pm$  S.E.M. (n= 3 independent experiments). \* $p < 0.05$  versus untreated neurons. # $p < 0.05$  versus Glutamate-treated neurons.

Supplementary Figure 2 - Veas-Perez de Tudela et al

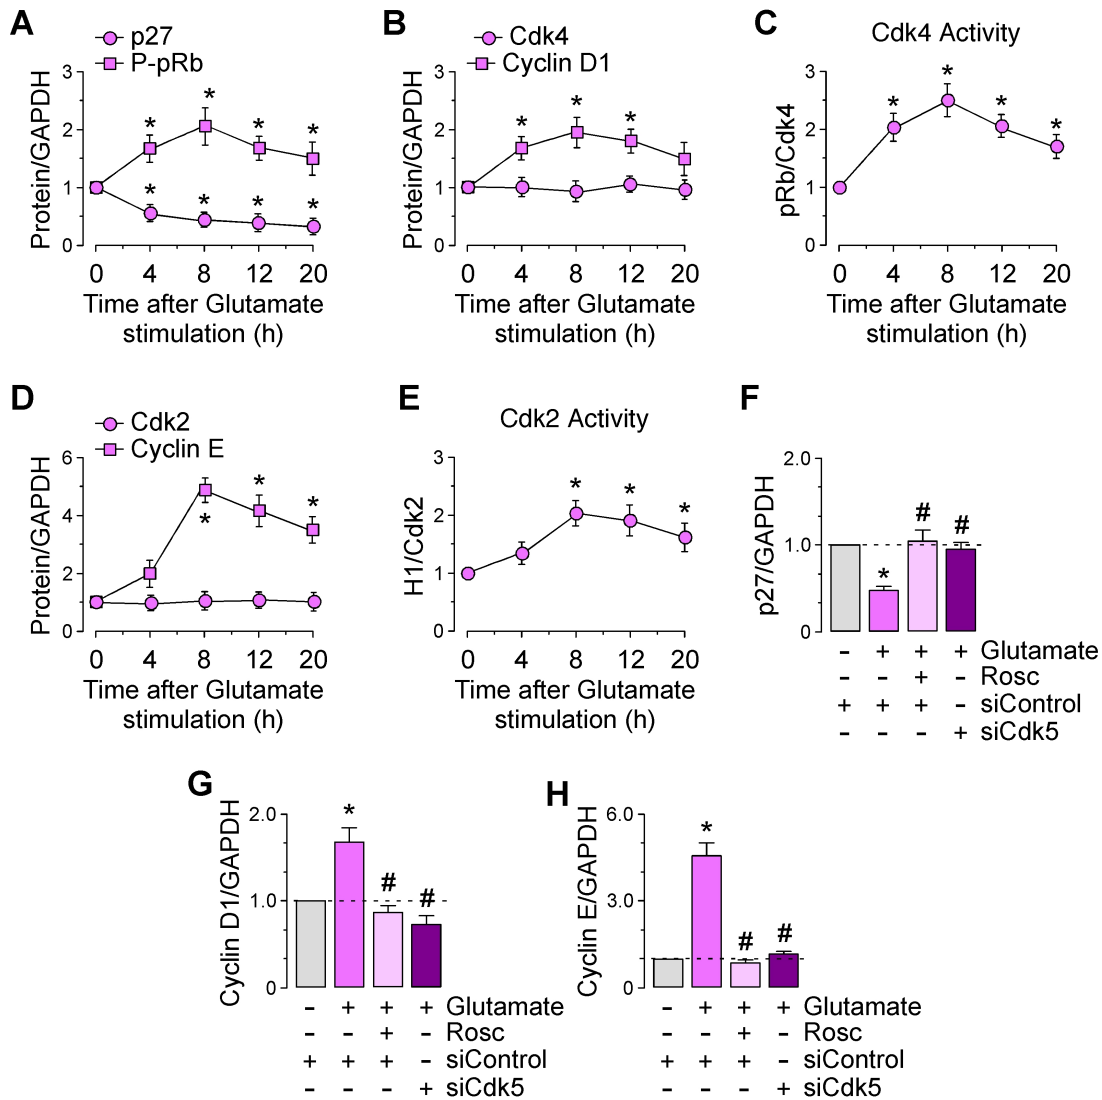

**Supplementary Figure 2. Relative protein abundances quantification from results shown in Fig. 3.** (A, B) Results of the relative quantification of protein abundance of Fig. 3A. (C) Results of the relative quantification of protein abundance of Fig. 3B. (D) Results of the relative quantification of protein abundance of Fig. 3C. (E) Results of the relative quantification of protein abundance of Fig. 3D. (F, G, H) Results of the relative quantification of protein abundance of Fig. 3E. Data are expressed as means  $\pm$  S.E.M. (n= 3 independent experiments). \*p<0.05 versus 0 hours (A-E) or untreated (F-H) neurons. #p<0.05 versus Glutamate-treated neurons.
